# Supplementary material for: Papillary glioneuronal tumor (PGNT) exhibits a characteristic methylation profile and fusions involving PRKCA
Source: Springer Nature journal article supplement (doi:10.1007/s00401-019-01969-2), 2019-02-13
Supplement: MOESM2 [file 16468868]

| PGNT group | Initial diagnosis | Age (years) | Gender | Location | Methylation class |
| --- | --- | --- | --- | --- | --- |
| Case 1 | PGNT | 39 | Female | Left temporal | PGNT |
| Case 2 | PGNT | 17 | Female | Left lateral ventricle | PGNT |
| Case 3 | PGNT | 13 | Male | Left mesial parietal | PGNT |
| Case 4 | PGNT | 32 | Male | Right parieto-occipital | PGNT |
| Case 5 | PGNT | 27 | Male | Right temporal | PGNT |
| Case 6 | PGNT | 15 | Female | Right frontal | PGNT |
| Case 7 | PGNT | 14 | Female | Supratentorial | PGNT |
| Case 8 | Recurrent PGNT | 54 | Male | N/A | PGNT |
| Case 9 | PGNT | 16 | Male | Right lateral ventricle | PGNT |
| Case 10* | Ependymoma | 14 | Female | intraventricular | PGNT |
| Case 11* | Central neurocytoma | 16 | Female | Left intraventricular | PGNT |
| Case 12* | Glioneuronal tumor | N/A | Female | Frontal cortex | PGNT |
| Case 13 | PGNT | 6 | Female | Left parietal | PGNT |
| Case 14 | PGNT | 14 | Male | Right temporal | PGNT |
| Case 15 | PGNT | 23 | Male | Temporal right | DNT |
| Case 16 | PGNT | 17 | Male | Lateral ventricle | DNT |
| Case 17 | PGNT | 27 | Male | Temporal right | DNT |
| Case 18 | PGNT | 32 | Male | Temporal right | DNT |
| Case 19 | PGNT | 27 | Male | Parieto-occipital right | Between DNT and PA HEMI |
| Case 20 | PGNT | 23 | Male | Central right | Between DNT and PA HEMI |
| Case 21 | PGNT | 36 | Female | Lateral ventricle right | DNT |
| Case 22 | PGNT progression | 6 | Female | Temporal | PA HEMI |
| Case 23 | PGNT | 32 | Female | Parietal left | DNT |
| Case 24 | PGNT | 27 | Female | Temporal | DNT |
| Case 25 | PGNT | 24 | Male | Supratentorial | Between DNT and PA HEMI |
| Case 26 | PGNT | 17 | Male | Temporal left | PA HEMI |
| Case 27 | PGNT | 14 | Female | Temporal left | PA HEMI |
| Case 28 | PGNT | 8 | Male | Temporal right | PA HEMI |
| Case 29 | PGNT | 50 | Female | Frontal | PA HEMI |
| Case 30 | PGNT | 7 | Female | Central left | DNT |
| Case 31 | PGNT | 5 | Male | Temporal right | PXA |

* identified tumors in large t-SNE plot belonging to MC PGNT, but originally histologically diagnosed otherwise.
